# Supplementary material for: T Helper Cell Infiltration in Osteoarthritis-Related Knee Pain and Disability
Source: PubMed Central journal article supplement (PMC7464429; doi:10.3390/jcm9082423), 2020-07-29
Supplement: jcm-09-02423-s001.pdf [file jcm-09-02423-s001.pdf]

**Table S1.** Results of the one-way ANOVA (Kruskal-Wallis test) followed by Dunn's multiple comparison between the percentage rates of different T helper cell subsets in the peripheral blood.

| Kruskal-Wallis Test                      | Dunn's Multiple Comparisons Test          | Mean Rank Difference | <i>p</i> -Value |
|------------------------------------------|-------------------------------------------|----------------------|-----------------|
| <i>p</i> -value < 0.0001                 | CXCR3 <sup>+</sup> vs. CCR5 <sup>+</sup>  | -25.58               | >0.9999         |
|                                          | CXCR3 <sup>+</sup> vs. CCR3 <sup>+</sup>  | 30.12                | 0.9204          |
|                                          | CXCR3 <sup>+</sup> vs. CCR4 <sup>+</sup>  | -85.58               | <0.0001         |
|                                          | CXCR3 <sup>+</sup> vs. CD161 <sup>+</sup> | 50.95                | 0.0265          |
|                                          | CXCR3 <sup>+</sup> vs. CCR6 <sup>+</sup>  | -21.30               | >0.9999         |
|                                          | CCR5 <sup>+</sup> vs. CCR3 <sup>+</sup>   | 55.70                | 0.0082          |
|                                          | CCR5 <sup>+</sup> vs. CCR4 <sup>+</sup>   | -60.00               | 0.0029          |
|                                          | CCR5 <sup>+</sup> vs. CD161 <sup>+</sup>  | 76.52                | <0.0001         |
|                                          | CCR5 <sup>+</sup> vs. CCR6 <sup>+</sup>   | 4.280                | >0.9999         |
|                                          | CCR3 <sup>+</sup> vs. CCR4 <sup>+</sup>   | -115.7               | <0.0001         |
|                                          | CCR3 <sup>+</sup> vs. CD161 <sup>+</sup>  | 20.82                | >0.9999         |
|                                          | CCR3 <sup>+</sup> vs. CCR6 <sup>+</sup>   | -51.42               | 0.0273          |
|                                          | CCR4 <sup>+</sup> vs. CD161 <sup>+</sup>  | 136.5                | <0.0001         |
|                                          | CCR4 <sup>+</sup> vs. CCR6 <sup>+</sup>   | 64.28                | 0.0015          |
| CD161 <sup>+</sup> vs. CCR6 <sup>+</sup> | -72.24                                    | 0.0002               |                 |

ANOVA = analysis of variance; CD = cluster of differentiation; CXCR3 = C-X-C motif chemokine receptor 3; CCR = C-C chemokine receptor.

**Table S2.** Results of the one-way ANOVA (Kruskal-Wallis test) followed by Dunn's multiple comparison between the percentage rates of different T helper cell subsets in the synovial membrane.

| Kruskal-Wallis Test                      | Dunn's Multiple Comparisons Test          | Mean Rank Difference | <i>p</i> -Value |
|------------------------------------------|-------------------------------------------|----------------------|-----------------|
| <i>p</i> -value < 0.0001                 | CXCR3 <sup>+</sup> vs. CCR5 <sup>+</sup>  | -38.61               | 0.1564          |
|                                          | CXCR3 <sup>+</sup> vs. CCR3 <sup>+</sup>  | 61.01                | 0.0008          |
|                                          | CXCR3 <sup>+</sup> vs. CCR4 <sup>+</sup>  | 6.689                | >0.9999         |
|                                          | CXCR3 <sup>+</sup> vs. CD161 <sup>+</sup> | 23.77                | >0.9999         |
|                                          | CXCR3 <sup>+</sup> vs. CCR6 <sup>+</sup>  | 95.75                | <0.0001         |
|                                          | CCR5 <sup>+</sup> vs. CCR3 <sup>+</sup>   | 99.62                | <0.0001         |
|                                          | CCR5 <sup>+</sup> vs. CCR4 <sup>+</sup>   | 45.30                | 0.0399          |
|                                          | CCR5 <sup>+</sup> vs. CD161 <sup>+</sup>  | 62.37                | 0.0005          |
|                                          | CCR5 <sup>+</sup> vs. CCR6 <sup>+</sup>   | 134.4                | <0.0001         |
|                                          | CCR3 <sup>+</sup> vs. CCR4 <sup>+</sup>   | -54.32               | 0.0047          |
|                                          | CCR3 <sup>+</sup> vs. CD161 <sup>+</sup>  | -37.25               | 0.1929          |
|                                          | CCR3 <sup>+</sup> vs. CCR6 <sup>+</sup>   | 34.74                | 0.3050          |
|                                          | CCR4 <sup>+</sup> vs. CD161 <sup>+</sup>  | 17.08                | >0.9999         |
|                                          | CCR4 <sup>+</sup> vs. CCR6 <sup>+</sup>   | 89.06                | <0.0001         |
| CD161 <sup>+</sup> vs. CCR6 <sup>+</sup> | 71.99                                     | <0.0001              |                 |

CD = cluster of differentiation; CXCR3 = C-X-C motif chemokine receptor 3; CCR = C-C chemokine receptor.

**Table S3.** Results of the one-way ANOVA (Kruskal-Wallis test) followed by Dunn's multiple comparison between the percentage rates of different T helper cell subsets in the synovial fluid.

| <b>Kruskal-Wallis Test</b> | <b>Dunn's Multiple Comparisons Test</b>   | <b>Mean Rank Difference</b> | <b><i>p</i>-Value</b> |
|----------------------------|-------------------------------------------|-----------------------------|-----------------------|
| <i>p</i> -value < 0.0001   | CXCR3 <sup>+</sup> vs. CCR5 <sup>+</sup>  | -30.44                      | 0.1560                |
|                            | CXCR3 <sup>+</sup> vs. CCR3 <sup>+</sup>  | 33.60                       | 0.0701                |
|                            | CXCR3 <sup>+</sup> vs. CCR4 <sup>+</sup>  | 16.17                       | > 0.9999              |
|                            | CXCR3 <sup>+</sup> vs. CD161 <sup>+</sup> | 53.29                       | 0.0001                |
|                            | CXCR3 <sup>+</sup> vs. CCR6 <sup>+</sup>  | 21.46                       | > 0.9999              |
|                            | CCR5 <sup>+</sup> vs. CCR3 <sup>+</sup>   | 64.04                       | < 0.0001              |
|                            | CCR5 <sup>+</sup> vs. CCR4 <sup>+</sup>   | 46.60                       | 0.0013                |
|                            | CCR5 <sup>+</sup> vs. CD161 <sup>+</sup>  | 83.73                       | < 0.0001              |
|                            | CCR5 <sup>+</sup> vs. CCR6 <sup>+</sup>   | 51.90                       | 0.0002                |
|                            | CCR3 <sup>+</sup> vs. CCR4 <sup>+</sup>   | -17.44                      | > 0.9999              |
|                            | CCR3 <sup>+</sup> vs. CD161 <sup>+</sup>  | 19.68                       | > 0.9999              |
|                            | CCR3 <sup>+</sup> vs. CCR6 <sup>+</sup>   | -12.14                      | > 0.9999              |
|                            | CCR4 <sup>+</sup> vs. CD161 <sup>+</sup>  | 37.12                       | 0.0299                |
|                            | CCR4 <sup>+</sup> vs. CCR6 <sup>+</sup>   | 5.295                       | > 0.9999              |
|                            | CD161 <sup>+</sup> vs. CCR6 <sup>+</sup>  | -31.83                      | 0.1309                |

CD = cluster of differentiation; CXCR3 = C-X-C motif chemokine receptor 3; CCR = C-C chemokine receptor.

**Table S4.** T cell infiltration in PB, SM and SF depending on UC and BC OA.

| T cells                                               | PB               |                  |                          | SM               |                  |                          | SF               |                  |                          |
|-------------------------------------------------------|------------------|------------------|--------------------------|------------------|------------------|--------------------------|------------------|------------------|--------------------------|
|                                                       | UC<br>Mean ± SEM | BC<br>Mean ± SEM | UC:BC<br><i>p</i> -Value | UC<br>Mean ± SEM | BC<br>Mean ± SEM | UC:BC<br><i>p</i> -Value | UC<br>Mean ± SEM | BC<br>Mean ± SEM | UC:BC<br><i>p</i> -Value |
| <b>CD3<sup>+</sup></b>                                |                  |                  |                          |                  |                  |                          |                  |                  |                          |
| Cell count                                            | 121988 ± 8867    | 123552 ± 7862    | n.s.                     | 47716 ± 14225    | 89224 ± 22348    | n.s.                     | 12508 ± 3805     | 16806 ± 6131     | n.s.                     |
| Cells/mL (g)                                          | 13957 ± 1378     | 15962 ± 1279     | n.s.                     | 18927 ± 5769     | 32184 ± 8206     | n.s.                     | 2690 ± 1117      | 1752 ± 450       | n.s.                     |
| <b>CD4<sup>+</sup></b>                                |                  |                  |                          |                  |                  |                          |                  |                  |                          |
| Cell count                                            | 98189 ± 7204     | 96031 ± 7003     | n.s.                     | 33582 ± 10439    | 68345 ± 18189    | n.s.                     | 3940 ± 1405      | 8900 ± 3638      | n.s.                     |
| Cells/mL (g)                                          | 11256 ± 1120     | 12462 ± 1141     | n.s.                     | 13491 ± 4474     | 24606 ± 6711     | n.s.                     | 881.8 ±          | 795.6 ± 251.4    | n.s.                     |
| % of CD3 <sup>+</sup> cells                           | 80.88 ± 1.97     | 77.10 ± 1.85     | n.s.                     | 65.92 ± 4.0      | 74.07 ± 1.47     | *<0.05                   | 36.41 ± 6.77     | 44.35 ± 3.72     | n.s.                     |
| <b>Th1</b>                                            |                  |                  |                          |                  |                  |                          |                  |                  |                          |
| CD4 <sup>+</sup> CXCR3 <sup>+</sup>                   |                  | ±                |                          |                  |                  |                          |                  |                  |                          |
| % of CD4 <sup>+</sup> cells                           | 23.94 ± 3.42     | 16.67 ± 2.13     | n.s.                     | 45.18 ± 5.35     | 34.35 ± 3.37     | n.s.                     | 64.94 ± 9.91     | 51.39 ± 6.93     | n.s.                     |
| CD4 <sup>+</sup> CCR5 <sup>+</sup>                    |                  |                  |                          |                  |                  |                          |                  |                  |                          |
| % of CD4 <sup>+</sup> cells                           | 22.38 ± 2.57     | 22.83 ± 1.87     | n.s.                     | 56.29 ± 3.92     | 48.62 ± 3.59     | n.s.                     | 82.57 ± 7.36     | 78.61 ± 4.93     | n.s.                     |
| CD4 <sup>+</sup> CXCR3 <sup>+</sup> CCR5 <sup>+</sup> |                  |                  |                          |                  |                  |                          |                  |                  |                          |
| % of CD4 <sup>+</sup> cells                           | 1.50 ± 0.35      | 1.67 ± 0.38      | n.s.                     | 8.15 ± 4.5       | 3.82 ± 0.74      | n.s.                     | 4.08 ± 2.4       | 5.06 ± 1.93      | n.s.                     |
| <b>Th2</b>                                            |                  |                  |                          |                  |                  |                          |                  |                  |                          |
| CD4 <sup>+</sup> CCR3 <sup>+</sup>                    |                  |                  |                          |                  |                  |                          |                  |                  |                          |
| % of CD4 <sup>+</sup> cells                           | 15.24 ± 2.03     | 13.12 ± 1.23     | n.s.                     | 22.32 ± 3.06     | 19.55 ± 2.49     | n.s.                     | 39.76 ± 11.61    | 27.88 ± 3.28     | n.s.                     |
| CD4 <sup>+</sup> CCR4 <sup>+</sup>                    |                  |                  |                          |                  |                  |                          |                  |                  |                          |
| % of CD4 <sup>+</sup> cells                           | 41.83 ± 4.11     | 38.68 ± 3.26     | n.s.                     | 35.13 ± 5.55     | 34.02 ± 2.28     | n.s.                     | 42.54 ± 10.49    | 40.93 ± 4.89     | n.s.                     |
| CD4 <sup>+</sup> CCR3 <sup>+</sup> CCR4 <sup>+</sup>  |                  | ±                |                          |                  |                  |                          |                  |                  |                          |
| % of CD4 <sup>+</sup> cells                           | 1.55 ± 0.17      | 1.85 ± 0.2       | n.s.                     | 1.38 ± 0.16      | 2.70 ± 0.52      | n.s.                     | 7.6 ± 3.57       | 9.07 ± 3.23      | n.s.                     |
| <b>Th17</b>                                           |                  |                  |                          |                  |                  |                          |                  |                  |                          |
| CD4 <sup>+</sup> CD161 <sup>+</sup>                   |                  |                  |                          |                  |                  |                          |                  |                  |                          |
| % of CD4 <sup>+</sup> cells                           | 11.24 ± 1.23     | 11.51 ± 1.59     | n.s.                     | 33.90 ± 7.41     | 28.61 ± 1.72     | n.s.                     | 25.36 ± 6.2      | 18.71 ± 1.65     | n.s.                     |
| CD4 <sup>+</sup> CCR6 <sup>+</sup>                    |                  |                  |                          |                  |                  |                          |                  |                  |                          |
| % of CD4 <sup>+</sup> cells                           | 19.33 ± 3.41     | 23.20 ± 2.17     | n.s.                     | 16.91 ± 7.63     | 11.12 ± 1.29     | n.s.                     | 44.29 ± 11.45    | 34.51 ± 4.99     | n.s.                     |

| CD4 <sup>+</sup> CD161 <sup>+</sup> CCR6 <sup>+</sup> |             |             |      |         |              |      |              |              |      |
|-------------------------------------------------------|-------------|-------------|------|---------|--------------|------|--------------|--------------|------|
| % of CD4 <sup>+</sup> cells                           | 8.15 ± 1.02 | 8.98 ± 0.88 | n.s. | 13.24 ± | 10.30 ± 0.48 | n.s. | 12.03 ± 3.01 | 12.73 ± 1.59 | n.s. |

The distribution of T cells in peripheral blood (PB), synovial membrane (SM) and synovial fluid (SF) samples compared between unicompartmental (UC) and bicompartamental osteoarthritis (OA). T lymphocytes were stained for CD4 to detect T helper cells (Th; CD3+CD4+, in Table referred to as CD4+). To analyze Th subpopulations (Th1, Th2, Th17) CD4+ cells were stained for distinct surface markers (Th1: CXCR3, CCR5; Th2: CCR3, CCR4; Th17: CD161, CCR6). For CD3+ MACS-isolated T lymphocytes mean cell count and concentration levels (cells/sample volume (mL) or weight (g)) are shown. For CD4+ cells the mean CD4+ T cell percentage rate (% of CD3+ cells stained positive for CD4) was calculated additionally. For different Th1, Th2 and Th17 cells mean percentage rates of CD4+ cells (% of % of CD4+ cells) are displayed. Unpaired t-test was used to compare the mean percentage rates between UC and BC patients. *p*-Values < 0.05 were considered statistically significant and are indicated with asterisks: \* *p* < 0.05. Data are presented as mean ± standard error of the mean (SEM). CD = cluster of differentiation; CXCR3 = C-X-C motif chemokine receptor 3; CCR = C-C chemokine receptor; n.s. = not significant.
